# Supplementary material for: Mesenchymal Stem Cells Attenuate Acute Lung Injury in Mice Partly by Suppressing Alveolar Macrophage Activation in a PGE2-dependent Manner
Source: Research Square preprint supplement (doi:10.21203/rs.3.rs-664786/v1), 2021-07-07
Supplement: Supplementary file 1 [file 5a13c1286672417a45de040f.xlsx]

## Sheet: Sheet 1
Transcription Factor	Target Gene
Aatf	Bak1	Unknown
Aatf	Bax	Unknown
Aatf	Bbc3	Unknown
Aatf	Cdkn1a	Unknown
Aatf	Tpt1	Activation
Aatf	Trp53	Activation
Abl1	Trp53	Unknown
Abl1	Trp73	Unknown
Aebp2	Jarid2	Unknown
Aebp2	Snai2	Unknown
Aes	Ihh	Activation
Ahr	Abcc4	Unknown
Ahr	Apaf1	Unknown
Ahr	Cyp19a1	Activation
Ahr	Cyp1a1	Activation
Ahr	Cyp1a1	Unknown
Ahr	Cyp1a2	Unknown
Ahr	Cyp1b1	Unknown
Ahr	E2f2	Unknown
Ahr	Gata4	Repression
Ahr	Gsta1	Activation
Ahr	Il17a	Repression
Ahr	Il17a	Unknown
Ahr	Il6	Repression
Ahr	Lhb	Unknown
Ahr	Nkx2-5	Repression
Ahr	Nqo1	Activation
Ahr	Nqo1	Unknown
Ahr	Pla2g4a	Activation
Ahr	Ptgs2	Activation
Ahr	Serpinb2	Unknown
Ahr	Sim1	Unknown
Ahr	Smoc2	Unknown
Ahr	Snai2	Activation
Ahr	Ugt1a6a	Activation
Ahr	Vav3	Activation
Aire	Bmp2	Unknown
Aire	F11	Activation
Alx4	Fgf10	Activation
Ankrd1	Myl2	Repression
Ankrd1	Nppa	Repression
Apbb1	Lrp1	Repression
Apbb1	Notch1	Unknown
Apc	Ctnnb1	Unknown
Apc	Myc	Repression
Apc	Spp1	Activation
Apc	Tcf4	Activation
Apc	Trp53	Repression
Apex1	Apod	Unknown
Apex1	Blk	Activation
Apex1	Ccl12	Activation
Apex1	Nfkb1	Activation
Apex1	Nfkb1	Unknown
Apex1	Pax5	Activation
Apex1	Ptgs2	Activation
Apex1	Rela	Activation
Apex1	Tlr4	Repression
Ar	Ccr2	Activation
Ar	Cga	Repression
Ar	Fkbp5	Unknown
Ar	Foxa1	Unknown
Ar	Klkb1	Unknown
Ar	Nkx3-1	Activation
Ar	Nkx3-1	Unknown
Ar	Nr0b1	Repression
Ar	Psat1	Unknown
Ar	Runx2	Repression
Ar	Scnn1a	Activation
Ar	Sox2	Repression
Ar	Tnf	Activation
Ar	rsl	Activation
Arid3a	Cr2	Unknown
Arid3a	Igh	Activation
Arid3b	Igh	Activation
Arid5b	Sox9	Unknown
Arl6ip5	Parp1	Repression
Arl6ip5	Xrcc1	Activation
Arnt	Atxn3	Unknown
Arnt	Cyp1a1	Activation
Arnt	Cyp1a2	Unknown
Arnt	Cyp1b1	Unknown
Arnt	E2f2	Unknown
Arnt	Sim1	Unknown
Arnt	Th	Repression
Arntl	Bhlhe40	Activation
Arntl	Bhlhe40	Unknown
Arntl	Bhlhe41	Unknown
Arntl	Ctnnb1	Unknown
Arntl	Cxcl5	Unknown
Arntl	Dbp	Unknown
Arntl	Maoa	Unknown
Arntl	Nfe2l2	Repression
Arntl	Per1	Activation
Arntl	Per1	Unknown
Arntl	Per2	Activation
Arntl	Tcf3	Unknown
Arntl	Vwf	Repression
Arntl	Wnt10a	Unknown
Arntl2	Thbd	Unknown
Arx	Kdm5c	Unknown
Arx	Shh	Activation
Ascl1	Bub1	Activation
Ascl1	Cdkn2d	Activation
Ascl1	Dll3	Unknown
Ascl1	Dll4	Activation
Ascl1	Hes5	Unknown
Ascl1	Pdgfra	Activation
Ascl1	Phox2a	Activation
Ascl1	Rnd3	Activation
Ascl1	Tph2	Activation
Ash1l	Tgfb1	Unknown
Ash1l	Timp1	Unknown
Asxl1	Fabp4	Unknown
Atf1	Cebpb	Unknown
Atf1	Hspa5	Activation
Atf1	Nudt1	Unknown
Atf1	Thbs1	Unknown
Atf2	Ccnd1	Activation
Atf2	Cebpa	Activation
Atf2	Entpd1	Activation
Atf2	Fgf21	Activation
Atf2	Fos	Activation
Atf2	Gabrb3	Activation
Atf2	Il23a	Repression
Atf2	Ins2	Activation
Atf2	Ins2	Unknown
Atf2	Per1	Unknown
Atf2	Pparg	Activation
Atf2	Rela	Activation
Atf2	Rhob	Activation
Atf2	Serpinb5	Activation
Atf2	Sox9	Unknown
Atf2	Tnf	Unknown
Atf2	Ucp1	Unknown
Atf3	Atf3	Repression
Atf3	Ccnd1	Activation
Atf3	Gck	Unknown
Atf3	Il12b	Repression
Atf3	Il6	Repression
Atf3	Pdx1	Repression
Atf3	Sort1	Repression
Atf3	Tnfrsf10b	Activation
Atf4	Bglap3	Unknown
Atf4	Cdkn1a	Activation
Atf4	Cdkn1b	Activation
Atf4	Ddr2	Activation
Atf4	Fgf15	Activation
Atf4	Fgf2	Unknown
Atf4	Hspa5	Activation
Atf4	Ihh	Unknown
Atf4	Il6	Activation
Atf4	Mcm7	Unknown
Atf4	Mir106b	Unknown
Atf4	Sphk2	Activation
Atf4	Trib3	Unknown
Atf6	Hspa5	Activation
Atf6	Wbp1	Activation
Atm	Cdkn1a	Repression
Atm	Sp7	Activation
Atm	Trp53	Activation
Atm	Trp53	Unknown
Atoh1	Barhl1	Activation
Atoh1	Hes6	Activation
Atoh1	Nr2f6	Activation
Atoh1	Pou4f3	Unknown
Bach1	Hbb	Repression
Bach1	Hmox1	Repression
Bach1	Hmox1	Unknown
Bach1	Mmp1a	Activation
Bach1	Trp53	Repression
Bach2	Prdm1	Repression
Barx2	Acta2	Unknown
Barx2	L1cam	Activation
Barx2	L1cam	Unknown
Barx2	Pax1	Unknown
Batf2	Ccl5	Activation
Batf2	Nos2	Activation
Batf2	Tnf	Activation
Batf3	Irf8	Activation
Bcl11a	Frzb	Activation
Bcl11b	Ahr	Repression
Bcl11b	Bcl2l1	Activation
Bcl11b	Cdkn1b	Activation
Bcl11b	Foxp3	Unknown
Bcl11b	Gfi1	Unknown
Bcl11b	Il10	Unknown
Bcl11b	Notch1	Unknown
Bcl11b	Runx3	Repression
Bcl11b	Zbtb7b	Repression
Bcl3	Ccnd1	Unknown
Bcl3	Ctsl	Unknown
Bcl3	Cxcl10	Unknown
Bcl3	Fbxo32	Unknown
Bcl3	Ifng	Unknown
Bcl3	Il23a	Unknown
Bcl3	Nfkb1	Repression
Bcl3	Nfkb1	Unknown
Bcl3	Nfkb2	Unknown
Bcl3	Nos1	Unknown
Bcl3	Runx1	Unknown
Bcl3	Tnf	Repression
Bcl3	Tnf	Unknown
Bcl3	Tnfaip3	Activation
Bcl3	Tnfrsf12a	Unknown
Bcl3	Trim63	Unknown
Bcl3	Ubc	Unknown
Bcl6	Batf	Repression
Bcl6	Bcl6	Repression
Bcl6	Cdkn1a	Repression
Bcl6	Cdkn1b	Repression
Bcl6	Cdkn2b	Repression
Bcl6	Csf1r	Activation
Bcl6	Gadd45a	Repression
Bcl6	Gata3	Activation
Bcl6	Gata3	Repression
Bcl6	Hdac7	Repression
Bcl6	Ifng	Unknown
Bcl6	Il17a	Unknown
Bcl6	Il9	Repression
Bcl6	Mir21a	Repression
Bcl6	Myc	Activation
Bcl6	Prdm1	Repression
Bcl6	Rorc	Unknown
Bcl6	Socs2	Unknown
Bcl6	Tbx21	Unknown
Bcl6b	Rbpj	Unknown
Bhlhe40	Il2ra	Activation
Bmi1	Cdk1	Unknown
Bmi1	Cdkn1a	Repression
Bmi1	Cdkn1a	Unknown
Bmi1	Cdkn2a	Activation
Bmi1	Cdkn2a	Repression
Bmi1	Cdkn2a	Unknown
Bmi1	Cdkn2d	Repression
Bmi1	Dkk1	Unknown
Bmi1	E4f1	Activation
Bmi1	Hmga2	Repression
Bmi1	Ikzf1	Repression
Bmi1	Nanog	Activation
Bmi1	Nanog	Repression
Bmi1	Nfkb1	Activation
Bmi1	Pmaip1	Unknown
Bmi1	Pten	Unknown
Bmp4	Chst11	Activation
Bmp6	Mycn	Unknown
Brca1	Akt1	Activation
Brca1	Cdkn1a	Activation
Brca1	Hmga2	Repression
Brca1	Mad2l1	Activation
Brca1	Mdm2	Activation
Brca1	Rad51	Activation
Brca1	Sirt1	Activation
Brca1	Tpt1	Activation
Brca2	Cdkn1a	Repression
Btg2	Atoh1	Activation
Btg2	Creb1	Activation
Bub3	Apod	Unknown
Cbfa2t3	Epb42	Unknown
Cbx6	Ccne1	Repression
Ccnd1	Cdkn2a	Activation
Cd7	Nfkb1	Activation
Cdx1	Ccl25	Unknown
Cdx1	Cdx2	Unknown
Cdx1	Mafb	Repression
Cdx2	Ccl25	Unknown
Cdx2	Cdh17	Activation
Cdx2	Cdx1	Unknown
Cdx2	Cdx4	Unknown
Cdx2	Glb1	Unknown
Cdx2	Heph	Activation
Cdx2	Kitl	Activation
Cdx2	Mgam	Unknown
Cdx2	Nanog	Repression
Cdx2	Nanog	Unknown
Cdx2	Pou5f1	Repression
Cdx2	Shh	Repression
Cdx2	Sis	Activation
Cdx2	Xist	Activation
Cdx4	Hoxa9	Unknown
Cebpa	Abca3	Unknown
Cebpa	Alb	Unknown
Cebpa	Aldh3a1	Unknown
Cebpa	Amelx	Activation
Cebpa	Apod	Unknown
Cebpa	Bcl2	Activation
Cebpa	Cflar	Activation
Cebpa	Clu	Activation
Cebpa	Crabp2	Repression
Cebpa	Elane	Unknown
Cebpa	Il12b	Activation
Cebpa	Il4	Activation
Cebpa	Lpin1	Activation
Cebpa	Mstn	Unknown
Cebpa	Nfkb1	Activation
Cebpa	Nos2	Activation
Cebpa	Nr1h3	Unknown
Cebpa	Pck1	Activation
Cebpa	Prtn3	Unknown
Cebpa	Ptgs2	Activation
Cebpa	Ptgs2	Unknown
Cebpa	Scgb1a1	Activation
Cebpa	Slc2a4	Activation
Cebpa	Spi1	Unknown
Cebpa	Zbtb16	Unknown
Cebpb	Abl1	Unknown
Cebpb	Abl2	Unknown
Cebpb	Alb	Unknown
Cebpb	Aldh3a1	Unknown
Cebpb	Atf3	Unknown
Cebpb	Bcl2	Activation
Cebpb	Bglap	Unknown
Cebpb	Btg2	Unknown
Cebpb	Cdkn1a	Unknown
Cebpb	Cebpa	Activation
Cebpb	Cebpa	Unknown
Cebpb	Clu	Activation
Cebpb	Cr2	Unknown
Cebpb	Csf1r	Repression
Cebpb	Csf3	Activation
Cebpb	Csf3	Unknown
Cebpb	Csn2	Unknown
Cebpb	Cxcr4	Unknown
Cebpb	Cyr61	Unknown
Cebpb	Fos	Activation
Cebpb	Fos	Unknown
Cebpb	Foxf1	Activation
Cebpb	Gsta2	Activation
Cebpb	H2-K1	Activation
Cebpb	Hgf	Unknown
Cebpb	Id2	Unknown
Cebpb	Il1b	Activation
Cebpb	Il5ra	Unknown
Cebpb	Il6	Unknown
Cebpb	Insr	Unknown
Cebpb	Mafb	Unknown
Cebpb	Myc	Repression
Cebpb	Pck1	Activation
Cebpb	Pparg	Activation
Cebpb	Ppargc1a	Activation
Cebpb	Ptgs1	Unknown
Cebpb	Ptgs2	Activation
Cebpb	Ptgs2	Unknown
Cebpb	Runx2	Repression
Cebpb	Runx2	Unknown
Cebpb	Scgb1a1	Repression
Cebpb	Serpine1	Activation
Cebpb	Slc10a1	Unknown
Cebpb	Snrpn	Unknown
Cebpb	Socs3	Unknown
Cebpb	Trp53	Unknown
Cebpb	Ucp1	Activation
Cebpe	Mxd1	Unknown
Cebpg	Cebpa	Repression
Cebpg	Cebpb	Repression
Cebpg	Il6	Unknown
Cebpz	Hspa1b	Activation
Chd1	Ubtfl1	Activation
Chd4	Cd4	Activation
Chd4	Id2	Repression
Chd4	Jun	Repression
Chd4	Ngfr	Repression
Chd7	Gli3	Unknown
Chd7	Jag1	Activation
Chd7	Mycn	Unknown
Chd7	Sox11	Activation
Chd7	Sox4	Activation
Chd8	Brca1	Unknown
Chd8	Myc	Unknown
Chd8	Stat3	Repression
Chd8	Tcf4	Repression
Ciita	Col1a2	Unknown
Ciita	Nfatc1	Activation
Ciita	Oscar	Activation
Cited2	Cebpa	Activation
Cited2	Fgf9	Repression
Cited2	Ldhb	Activation
Cited2	Ldhd	Activation
Cited2	Mmp9	Activation
Cited2	Nr5a1	Activation
Cited2	Pdk2	Activation
Cited2	Pdk4	Activation
Cited2	Pparg	Activation
Cited2	Smad3	Activation
Cited2	Wnt4	Activation
Clock	Bhlhe40	Activation
Clock	Bhlhe41	Activation
Clock	Bhlhe40	Unknown
Clock	Bhlhe41	Unknown
Clock	Cry1	Activation
Clock	Cry2	Activation
Clock	Dbp	Unknown
Clock	Nr0b2	Activation
Clock	Nampt	Activation
Clock	Per1	Activation
Clock	Per1	Unknown
Clock	Per2	Activation
Clock	Scnn1a	Unknown
Clock	Serpine1	Activation
Clock	Serpine2	Activation
Clock	Thbd	Unknown
Clock	Tpo	Unknown
Clock	Vwf	Unknown
Cnot3	Myc	Unknown
Cnot3	Zfx	Unknown
Cnot7	Tob1	Activation
Cops5	Hand2	Unknown
Creb1	Acsl4	Unknown
Creb1	Bcl2	Unknown
Creb1	Cftr	Unknown
Creb1	Cldn11	Unknown
Creb1	Crtc2	Unknown
Creb1	Entpd1	Activation
Creb1	Esr1	Unknown
Creb1	Etv2	Unknown
Creb1	Etv3	Activation
Creb1	Fos	Activation
Creb1	Fos	Repression
Creb1	Fos	Unknown
Creb1	Hspa5	Activation
Creb1	Il10	Activation
Creb1	Ldha	Unknown
Creb1	Mif	Activation
Creb1	Mitf	Activation
Creb1	Nf1	Unknown
Creb1	Nfkbiz	Unknown
Creb1	Nmnat2	Unknown
Creb1	Noct	Activation
Creb1	Nrf1	Unknown
Creb1	Pde3b	Unknown
Creb1	Penk	Unknown
Creb1	Ppargc1a	Unknown
Creb1	Ppm1d	Unknown
Creb1	Prkce	Unknown
Creb1	Ptgs2	Activation
Creb1	Ptgs2	Unknown
Creb1	Nectin2	Unknown
Creb1	Ren1	Activation
Creb1	Slc20a1	Activation
Creb1	Slc2a3	Activation
Creb1	Twist1	Unknown
Creb3	Apoa4	Unknown
Creb3	Herpud1	Activation
Creb3l1	Gcm1	Unknown
Creb3l1	Mmp3	Activation
Creb3l1	Slc1a4	Repression
Creb3l3	Hamp	Unknown
Creb3l3	Smurf1	Activation
Creb3l4	Edem1	Activation
Crebbp	Alx1	Activation
Crebbp	Bcl2	Unknown
Crebbp	Birc5	Activation
Crebbp	Tdgf1	Unknown
Crebbp	Clock	Unknown
Crebbp	Crebbp	Repression
Crebbp	Crx	Activation
Crebbp	Cryab	Activation
Crebbp	Cyp11a1	Activation
Crebbp	Ep300	Unknown
Crebbp	Esr1	Unknown
Crebbp	F7	Unknown
Crebbp	Fos	Activation
Crebbp	Fosb	Unknown
Crebbp	Foxp3	Activation
Crebbp	Fth1	Repression
Crebbp	Gh	Unknown
Crebbp	Grip1	Unknown
Crebbp	Hgf	Unknown
Crebbp	Hmox1	Activation
Crebbp	Ifnb1	Unknown
Crebbp	Il6	Unknown
Crebbp	Krt16	Unknown
Crebbp	Ldha	Unknown
Crebbp	Med1	Unknown
Crebbp	Hinfp	Activation
Crebbp	Mt1	Activation
Crebbp	Myh1	Unknown
Crebbp	Nfkb1	Activation
Crebbp	Nfya	Unknown
Crebbp	Nfyb	Unknown
Crebbp	Npas2	Unknown
Crebbp	Per1	Unknown
Crebbp	Rs1	Unknown
Crebbp	Setdb1	Repression
Crebbp	Socs3	Unknown
Crebbp	Spib	Activation
Crebbp	Sst	Unknown
Crebbp	Star	Unknown
Crebbp	Tnf	Activation
Crebbp	Tnf	Unknown
Crebbp	Trp53	Activation
Crebbp	Trp53	Unknown
Crebzf	Adipoq	Repression
Crem	Ren1	Activation
Crtc1	Creb1	Activation
Crx	Fam161a	Unknown
Crx	Kcnv2	Activation
Crx	Nr2e3	Activation
Crx	Pde6a	Activation
Crx	Pde6b	Activation
Crx	Pde6b	Unknown
Crx	Rbp3	Activation
Crx	Rbp3	Repression
Crx	Rho	Repression
Crx	Rho	Unknown
Crx	Rs1	Activation
Crx	Sag	Activation
Crx	Sag	Unknown
Crx	Samd11	Unknown
Crx	Samd7	Unknown
Cry1	Per2	Unknown
Csf1	Cd36	Activation
Csf2	Itgb3	Unknown
Ctcf	Atxn7	Unknown
Ctcf	Celsr3	Unknown
Ctcf	Csf2	Unknown
Ctcf	Igf2	Unknown
Ctcf	Irak2	Unknown
Ctcf	Mgat5b	Activation
Ctcf	Pax6	Repression
Ctcf	Pax6	Unknown
Ctcfl	Gal3st1	Activation
Ctf1	Tgfb1	Unknown
Ctnnb1	Atoh1	Unknown
Ctnnb1	Axin2	Activation
Ctnnb1	Axin2	Unknown
Ctnnb1	Bcl2l1	Activation
Ctnnb1	Bglap	Unknown
Ctnnb1	Bglap2	Activation
Ctnnb1	Birc5	Activation
Ctnnb1	Bmp4	Activation
Ctnnb1	Casp3	Unknown
Ctnnb1	Ccl7	Repression
Ctnnb1	Ccnd1	Activation
Ctnnb1	Ccnd1	Unknown
Ctnnb1	Ccne1	Activation
Ctnnb1	Cdh1	Unknown
Ctnnb1	Cdx1	Unknown
Ctnnb1	Cdx2	Activation
Ctnnb1	Cdx4	Unknown
Ctnnb1	Cyp19a1	Activation
Ctnnb1	Cyp2b10	Activation
Ctnnb1	E2f1	Repression
Ctnnb1	Ephb2	Unknown
Ctnnb1	Fas	Unknown
Ctnnb1	Fgf8	Unknown
Ctnnb1	Fgfbp1	Activation
Ctnnb1	Vegfd	Activation
Ctnnb1	Foxa2	Repression
Ctnnb1	Foxj1	Unknown
Ctnnb1	Gast	Activation
Ctnnb1	Gja1	Activation
Ctnnb1	Gja1	Unknown
Ctnnb1	Glul	Activation
Ctnnb1	Grem2	Activation
Ctnnb1	Ihh	Repression
Ctnnb1	Inha	Unknown
Ctnnb1	Isl1	Unknown
Ctnnb1	Lect2	Activation
Ctnnb1	Lef1	Activation
Ctnnb1	Lhb	Activation
Ctnnb1	Met	Unknown
Ctnnb1	Mitf	Unknown
Ctnnb1	Mmp13	Activation
Ctnnb1	Mmp7	Activation
Ctnnb1	Mmp7	Unknown
Ctnnb1	Myc	Unknown
Ctnnb1	Mycn	Activation
Ctnnb1	Myf5	Activation
Ctnnb1	Nanog	Activation
Ctnnb1	Neurog1	Unknown
Ctnnb1	Nr0b1	Activation
Ctnnb1	Otx2	Unknown
Ctnnb1	Pdgfra	Unknown
Ctnnb1	Pitx2	Activation
Ctnnb1	Pml	Activation
Ctnnb1	Ppard	Activation
Ctnnb1	Ptgs2	Activation
Ctnnb1	Ptgs2	Unknown
Ctnnb1	Rapsn	Repression
Ctnnb1	Runx2	Activation
Ctnnb1	Slc2a1	Activation
Ctnnb1	Smc3	Unknown
Ctnnb1	Tbx3	Unknown
Ctnnb1	Tcf4	Activation
Ctnnb1	Twist1	Activation
Ctnnb1	Twist1	Unknown
Ctnnb1	Vegfa	Activation
Ctnnb1	Wisp1	Activation
Ctnnb1	Wnt1	Activation
Ctnnb1	Wnt4	Unknown
Ctr9	Il6	Unknown
Cux1	Atp6v1e2	Unknown
Cux1	Ccna2	Activation
Cux1	Cdkn1a	Repression
Cux1	Cdkn1b	Repression
Cux1	Dctn6	Repression
Cux1	Fam89b	Repression
Cux1	Hist2h4	Activation
Cux1	Mar1	Unknown
Cux1	Myc	Unknown
Cux1	Ncam1	Repression
Cux1	Pola1	Unknown
Cux1	Runx2	Repression
Cux1	Sis	Repression
Cux2	Cdkn1b	Unknown
Dab2	Axin1	Repression
Dach1	Ccnd1	Repression
Dach1	Cdkn1b	Unknown
Dach1	Cxcl15	Repression
Dach1	Klf4	Unknown
Dach1	Lin28a	Unknown
Dach1	Nanog	Repression
Dach1	Sox2	Repression
Dach2	Myog	Repression
Daxx	Birc2	Unknown
Daxx	Birc3	Unknown
Daxx	Nr5a1	Activation
Daxx	Mapk8ip1	Unknown
Daxx	Trp53	Repression
Dbp	Arnt	Activation
Dbp	Bik	Activation
Dbp	Per1	Activation
Ddit3	Bbc3	Activation
Ddit3	Nos3	Repression
Ddx5	Igf2	Unknown
Ddx54	Mbp	Activation
Ddx58	Ifnb1	Activation
Deaf1	Eif4g3	Unknown
Dlx1	Arx	Activation
Dlx2	Amelx	Unknown
Dlx2	Arx	Activation
Dlx2	Dlx6	Activation
Dlx2	Foxj1	Unknown
Dlx2	Nrp2	Repression
Dlx2	Pagr1a	Unknown
Dlx3	Bglap	Activation
Dlx3	Dspp	Unknown
Dlx3	Hsd3b6	Unknown
Dlx3	Mmp9	Activation
Dlx3	Pgf	Unknown
Dlx3	Runx2	Activation
Dlx5	Alpl	Activation
Dlx5	Dspp	Unknown
Dlx5	Gbx2	Unknown
Dlx5	Ibsp	Activation
Dlx5	Igfbp3	Unknown
Dlx5	Myc	Activation
Dlx5	Runx2	Activation
Dlx5	Runx2	Unknown
Dlx5	Sp7	Activation
Dlx5	Wnt5a	Activation
Dmap1	Bmi1	Unknown
Dmbx1	Crx	Repression
Dmbx1	Otx1	Repression
Dmbx1	Otx2	Repression
Dmp1	Trp53	Activation
Dmrt1	Sox2	Repression
Dmrt2	Myf5	Activation
Dmtf1	Areg	Repression
Dmtf1	Ccnd2	Unknown
Dmtf1	Cdkn2a	Activation
Dmtf1	Cdkn2a	Unknown
Dmtf1	Egr1	Repression
Dmtf1	Ets1	Unknown
Dmtf1	Ets2	Unknown
Dmtf1	Junb	Repression
Dmtf1	Tsp1	Repression
Dnajc2	Id1	Activation
Dnmt1	Cdkn1a	Unknown
Dnmt1	Dnmt1	Unknown
Dnmt1	Mt1	Unknown
Dnmt1	Epcam	Unknown
Dnmt1	Trp53	Unknown
Dnmt3a	Dpp6	Unknown
Dnmt3a	Ifng	Unknown
Dnmt3a	Mdm2	Activation
Dnmt3a	Mt1	Unknown
Dnmt3a	Nanog	Repression
Dnmt3a	Pou5f1	Repression
Dnmt3a	Rb1	Repression
Dnmt3a	Vtn	Activation
Dnmt3a	Vtn	Unknown
Dnmt3b	Nanog	Repression
Dnmt3b	Pou5f1	Repression
Dnmt3b	Vtn	Unknown
Dot1l	Scnn1a	Repression
Dtx1	Smarcc1	Repression
E2f1	Apaf1	Unknown
E2f1	Atm	Activation
E2f1	Atp6v1e2	Unknown
E2f1	Bcl2	Repression
E2f1	Bid	Activation
E2f1	Bin1	Repression
E2f1	Bmi1	Activation
E2f1	Ccna2	Unknown
E2f1	Ccnd1	Repression
E2f1	Ccnd1	Unknown
E2f1	Cdkn1a	Activation
E2f1	Cdkn2a	Activation
E2f1	Cdkn2a	Unknown
E2f1	Cdkn2c	Activation
E2f1	Ddb2	Activation
E2f1	Dhfr	Unknown
E2f1	Dlx1	Repression
E2f1	Dlx2	Repression
E2f1	Dnmt1	Repression
E2f1	Dnmt1	Unknown
E2f1	Egr1	Activation
E2f1	Fbn2	Activation
E2f1	Gins3	Unknown
E2f1	Hinfp	Repression
E2f1	Hmga1	Activation
E2f1	Mcl1	Repression
E2f1	Mcm8	Unknown
E2f1	Mertk	Unknown
E2f1	Mxd3	Unknown
E2f1	Mycn	Activation
E2f1	Mycn	Unknown
E2f1	Myh10	Activation
E2f1	Nfe2l2	Unknown
E2f1	Nfkb1	Unknown
E2f1	Nos2	Unknown
E2f1	Nox4	Activation
E2f1	Npat	Activation
E2f1	Nrp1	Repression
E2f1	Pcna	Activation
E2f1	Pdgfra	Unknown
E2f1	Pdk4	Repression
E2f1	Pola1	Activation
E2f1	Pura	Activation
E2f1	Rb1	Repression
E2f1	Siva1	Activation
E2f1	Tapbp	Activation
E2f1	Tapbp	Repression
E2f1	Tgfb2	Unknown
E2f1	Tk1	Unknown
E2f1	Tlr3	Repression
E2f1	Tpt1	Unknown
E2f1	Trp53	Repression
E2f1	Trp53	Unknown
E2f1	Trp73	Unknown
E2f1	Vegfa	Repression
E2f2	Cdkn2a	Activation
E2f2	Chek1	Repression
E2f2	Ece1	Unknown
E2f2	Fgfr2	Activation
E2f2	Mcm5	Repression
E2f3	Cdkn2a	Activation
E2f3	Ddb2	Unknown
E2f3	Fgf2	Unknown
E2f3	Igf2	Activation
E2f3	Mycn	Unknown
E2f3	Pmp2	Activation
E2f3	Tfe3	Unknown
E2f4	Brca1	Repression
E2f4	E2f2	Activation
E2f4	Fgf2	Unknown
E2f4	Map1lc3b	Activation
E2f4	Mybl2	Activation
E2f4	Mycn	Unknown
E2f4	Plk4	Unknown
E2f4	Rad51	Repression
E2f4	Rb1	Repression
E2f4	Stmn1	Unknown
E2f5	Mir449a	Unknown
E2f8	E2f1	Repression
E4f1	Ccna2	Repression
E4f1	Ids	Activation
Ebf1	Blk	Activation
Ebf1	Cd79a	Activation
Ebf1	Igll1	Unknown
Ebf1	Omp	Activation
Ebf1	Omp	Unknown
Ebf1	Pax5	Activation
Ebf1	Pparg	Activation
Ebf1	Tac4	Unknown
Ebf1	Zfp423	Repression
Ebf1	Zfp521	Activation
Ebf1	Zfp521	Repression
Edn1	Ren1	Repression
Egr1	Ache	Unknown
Egr1	Bax	Unknown
Egr1	Birc5	Unknown
Egr1	Bnip3	Repression
Egr1	Cacna1h	Unknown
Egr1	Cat	Unknown
Egr1	Ccl2	Activation
Egr1	Ccnd1	Unknown
Egr1	Ccnd2	Unknown
Egr1	Cdk5r1	Activation
Egr1	Cdkn1c	Activation
Egr1	Cdkn2d	Unknown
Egr1	Chrna7	Repression
Egr1	Crebbp	Activation
Egr1	Cxcl2	Activation
Egr1	Eno1	Unknown
Egr1	Epo	Activation
Egr1	F3	Unknown
Egr1	Fas	Unknown
Egr1	Fgf2	Unknown
Egr1	Gadd45a	Unknown
Egr1	Gadd45b	Unknown
Egr1	Ggps1	Activation
Egr1	Gnrh1	Unknown
Egr1	Hsd11b2	Repression
Egr1	Icam1	Activation
Egr1	Id3	Activation
Egr1	Ifngr1	Unknown
Egr1	Igf1r	Unknown
Egr1	Il1b	Activation
Egr1	Il2	Activation
Egr1	Il4	Activation
Egr1	Itga7	Activation
Egr1	Itgb6	Repression
Egr1	Jun	Unknown
Egr1	Jund	Activation
Egr1	Lhb	Activation
Egr1	Lhb	Repression
Egr1	Ltb	Unknown
Egr1	Map1lc3b	Activation
Egr1	Mapk14	Activation
Egr1	Mapk8	Activation
Egr1	Met	Repression
Egr1	Mmp14	Activation
Egr1	Mmp9	Activation
Egr1	Ndrg1	Unknown
Egr1	Ngb	Unknown
Egr1	Ngfr	Activation
Egr1	Ngfr	Unknown
Egr1	Nr4a1	Activation
Egr1	Ntrk1	Unknown
Egr1	Pdx1	Activation
Egr1	Pnmt	Unknown
Egr1	Ppp1r1b	Activation
Egr1	Pten	Activation
Egr1	Pten	Unknown
Egr1	Ptges	Activation
Egr1	Ptges	Unknown
Egr1	Ptges2	Unknown
Egr1	Ptprz1	Activation
Egr1	Rcan1	Unknown
Egr1	Serpine1	Activation
Egr1	Smad7	Unknown
Egr1	Socs1	Unknown
Egr1	Stim1	Activation
Egr1	Syn2	Unknown
Egr1	Tgfbr2	Unknown
Egr1	Th	Unknown
Egr1	Thbs1	Activation
Egr1	Tk1	Activation
Egr1	Tnf	Activation
Egr1	Tnf	Unknown
Egr1	Trp53	Activation
Egr1	Trp73	Activation
Egr1	Wnt4	Unknown
Egr1	Il12a	Activation
Egr2	Cbl	Activation
Egr2	Cebpb	Activation
Egr2	Fasl	Repression
Egr2	Hoxa2	Activation
Egr2	Hoxb1	Repression
Egr2	Hoxb2	Unknown
Egr2	Id2	Activation
Egr2	Id2	Unknown
Egr2	Id4	Unknown
Egr2	Il2rb	Unknown
Egr2	Mpz	Activation
Egr2	Nab1	Activation
Egr2	Nab2	Activation
Egr2	Ncmap	Unknown
Egr2	Zbtb16	Activation
Egr2	Zbtb16	Repression
Egr3	Fasl	Activation
Egr3	Fasl	Unknown
Egr3	Ifngr1	Unknown
Egr3	Ngfr	Unknown
Egr4	Nfkb1	Unknown
Egr4	Slc12a5	Activation
Ehf	Tlr11	Unknown
Ehmt1	Ccnd1	Unknown
Ehmt2	Ccnd1	Unknown
Ehmt2	Cdkn1a	Unknown
Ehmt2	Fgf21	Repression
Ehmt2	Pou5f1	Activation
Ehmt2	Pparg	Repression
Ehmt2	Wnt10a	Activation
Eif2ak2	Stat1	Repression
Elf1	Cd1d1	Unknown
Elf1	Csf1r	Activation
Elf1	Dntt	Activation
Elf1	Epha7	Activation
Elf1	Fcer1a	Unknown
Elf1	Fcer1g	Repression
Elf1	Fli1	Activation
Elf1	Il3	Unknown
Elf1	Lyl1	Activation
Elf1	Rhox5	Activation
Elf1	Tal1	Unknown
Elf1	Tollip	Repression
Elf2	Cd3d	Activation
Elf3	Angpt1	Activation
Elf3	Tgfb1	Unknown
Elf3	Tgfbr2	Activation
Elf3	Tgfbr2	Unknown
Elf3	Tlr11	Unknown
Elf4	Bglap	Unknown
Elf4	Dlx5	Repression
Elf4	Mab21l1	Activation
Elf4	Msx2	Activation
Elf4	Trp53	Repression
Elf5	Ccnd2	Repression
Elf5	Stat5a	Unknown
Elk1	Egr1	Unknown
Elk1	Fos	Activation
Elk1	Fos	Unknown
Elk1	Hmox1	Activation
Elk1	Il6	Activation
Elk1	Mylk	Repression
Elk1	Mylk3	Activation
Elk1	Tbp	Unknown
Elk3	Nos2	Repression
Elk3	Pcyt1a	Repression
Elk3	Serpine1	Repression
Ell3	Trp53	Repression
Ell3	Zeb1	Activation
Ell3	Zeb2	Activation
Elp2	Pou5f1	Activation
Elp3	Pou5f1	Activation
Emx2	Alx1	Activation
Emx2	Pax6	Repression
En1	Elf1	Activation
En1	Gbx2	Repression
En1	Pax5	Activation
En1	Wnt7a	Repression
En2	Pax5	Activation
Eomes	Ebf1	Unknown
Eomes	Il17a	Repression
Eomes	Mesp1	Activation
Eomes	Prf1	Unknown
Eomes	Rorc	Repression
Eomes	Sox2	Repression
Ep300	Aldh3a1	Unknown
Ep300	Axin2	Unknown
Ep300	Bglap	Unknown
Ep300	Birc5	Unknown
Ep300	COX2	Unknown
Ep300	Cav3	Activation
Ep300	Ccnb2	Unknown
Ep300	Ccnd1	Repression
Ep300	Ccnd1	Unknown
Ep300	Cdkn1a	Activation
Ep300	Chrne	Unknown
Ep300	Clock	Unknown
Ep300	Col1a2	Repression
Ep300	Col2a1	Activation
Ep300	Cpt1b	Activation
Ep300	Creb1	Unknown
Ep300	Cryab	Activation
Ep300	Dnmt1	Activation
Ep300	Edn1	Unknown
Ep300	F7	Unknown
Ep300	Fasn	Unknown
Ep300	Flt4	Repression
Ep300	Fn1	Unknown
Ep300	Fos	Activation
Ep300	Gata4	Unknown
Ep300	Hmox1	Activation
Ep300	Hrh4	Unknown
Ep300	Il6	Unknown
Ep300	Irf2	Unknown
Ep300	Irs1	Unknown
Ep300	Klf5	Unknown
Ep300	Ldha	Unknown
Ep300	Mef2c	Unknown
Ep300	Hinfp	Activation
Ep300	Mmp2	Unknown
Ep300	Mmp9	Activation
Ep300	Mt1	Activation
Ep300	Myb	Activation
Ep300	Myod1	Activation
Ep300	Neurod1	Activation
Ep300	Nos2	Unknown
Ep300	Npas2	Unknown
Ep300	Npr1	Activation
Ep300	Npr1	Unknown
Ep300	Nr0b2	Activation
Ep300	Nr1h4	Repression
Ep300	Pou5f1	Unknown
Ep300	Pparg	Activation
Ep300	Ptgs2	Activation
Ep300	Ptgs2	Unknown
Ep300	Rarb	Unknown
Ep300	Rs1	Unknown
Ep300	Scd1	Unknown
Ep300	Smad3	Unknown
Ep300	Socs3	Unknown
Ep300	Spp1	Activation
Ep300	Stat5a	Activation
Ep300	Tapbp	Unknown
Ep300	Tff2	Repression
Ep300	Tnfsf10	Activation
Ep300	Tnfsf13b	Activation
Ep300	Txnip	Unknown
Ep300	Wnt4	Unknown
Epas1	Abcg2	Unknown
Epas1	Cdh5	Activation
Epas1	Cited2	Activation
Epas1	Col10a1	Activation
Epas1	Efna1	Unknown
Epas1	Epo	Activation
Epas1	Epo	Unknown
Epas1	Flt1	Activation
Epas1	Fxn	Repression
Epas1	Kdr	Activation
Epas1	Pou5f1	Activation
Epas1	Runx2	Activation
Epas1	Serpine1	Activation
Epas1	Vcam1	Unknown
Epc1	Tagln	Activation
Epo	Osm	Activation
Epor	Cish	Activation
Erf	Utrn	Repression
Erg	Cdh5	Unknown
Erg	Erg	Activation
Erg	Icam2	Unknown
Erg	Lyl1	Activation
Erg	Snai1	Unknown
Erg	Snai2	Unknown
Erg	Vim	Activation
Erg	Vwf	Unknown
Esr1	Bmp2	Activation
Esr1	Casp12	Unknown
Esr1	Ccnd1	Unknown
Esr1	Cdkn1a	Repression
Esr1	Cyp19a1	Unknown
Esr1	Esrra	Unknown
Esr1	F12	Activation
Esr1	Fasl	Activation
Esr1	Fos	Unknown
Esr1	H19	Activation
Esr1	Igf1	Activation
Esr1	Ltf	Activation
Esr1	Myc	Unknown
Esr1	Nell2	Activation
Esr1	Nr0b2	Unknown
Esr1	Nrf1	Activation
Esr1	Pik3r1	Unknown
Esr1	Pou3f1	Unknown
Esr1	Pparg	Repression
Esr1	Ptgs1	Activation
Esr1	Slc2a4	Activation
Esr1	Slc2a4	Unknown
Esr1	Slc7a1	Unknown
Esr1	Srebf1	Unknown
Esr1	Stat3	Unknown
Esr1	Stat5a	Repression
Esr1	Tac2	Activation
Esr1	Th	Activation
Esr1	Tnfsf11	Activation
Esr1	Vegfa	Unknown
Esr2	Akt1	Activation
Esr2	Ar	Repression
Esr2	Bcl2	Activation
Esr2	Bmp2	Activation
Esr2	Casp3	Repression
Esr2	Casp8	Repression
Esr2	Igf1r	Repression
Esr2	Mapk1	Repression
Esr2	Mapk3	Repression
Esr2	Mapk8	Repression
Esr2	Nell2	Activation
Esr2	Pparg	Repression
Esr2	Ptgds	Activation
Esr2	Ptgs1	Activation
Esr2	Slc2a4	Repression
Esr2	Slc2a4	Unknown
Esr2	Stat5a	Repression
Esr2	Vegfa	Unknown
Esrra	Acadm	Unknown
Esrra	Apoa4	Activation
Esrra	Nrip1	Activation
Esrra	Ppara	Unknown
Esrra	Ppargc1a	Activation
Esrra	Rb1cc1	Unknown
Esrra	Spp1	Activation
Esrra	Spp1	Unknown
Esrra	Trp53	Unknown
Esrrb	Nanog	Unknown
Esrrb	Nr0b1	Activation
Esrrb	Usp17le	Unknown
Esrrg	Mir127	Activation
Esrrg	Mir433	Activation
Esrrg	Nr0b1	Activation
Esrrg	Yy1	Unknown
Ets1	Emsy	Unknown
Ets1	Angpt2	Activation
Ets1	Anpep	Activation
Ets1	Bmp4	Activation
Ets1	Ccl2	Activation
Ets1	Ccl2	Unknown
Ets1	Cd3d	Activation
Ets1	Cd4	Activation
Ets1	Cdh5	Unknown
Ets1	Cdkn2a	Activation
Ets1	Csf1r	Activation
Ets1	Csf3r	Activation
Ets1	Ctgf	Activation
Ets1	Pf4	Activation
Ets1	Ebf1	Unknown
Ets1	Egr1	Unknown
Ets1	Erg	Activation
Ets1	Fli1	Activation
Ets1	Fos	Unknown
Ets1	Foxp3	Unknown
Ets1	Hmox1	Activation
Ets1	Ighm	Activation
Ets1	Ikzf1	Activation
Ets1	Il10	Repression
Ets1	Il5	Activation
Ets1	Il7r	Activation
Ets1	Itga2b	Activation
Ets1	Kdr	Activation
Ets1	Krt8	Unknown
Ets1	Ltbr	Unknown
Ets1	Met	Unknown
Ets1	Mir126a	Activation
Ets1	Mmp13	Activation
Ets1	Mmp1a	Activation
Ets1	Mmp1a	Unknown
Ets1	Mmp3	Unknown
Ets1	Mmp9	Unknown
Ets1	Nos3	Unknown
Ets1	Npr1	Activation
Ets1	Npr1	Unknown
Ets1	Nr2f1	Activation
Ets1	Nr2f2	Unknown
Ets1	Oprd1	Activation
Ets1	Pcyt1a	Activation
Ets1	Pcyt1a	Unknown
Ets1	Prdm1	Repression
Ets1	Ptgs2	Activation
Ets1	Retnla	Activation
Ets1	Rnf11	Activation
Ets1	Runx2	Activation
Ets1	Runx3	Unknown
Ets1	Sell	Activation
Ets1	Serpinb5	Activation
Ets1	Sh2d1a	Unknown
Ets1	Spp1	Activation
Ets1	Tbx21	Unknown
Ets1	Tgfbr2	Activation
Ets1	Thbd	Unknown
Ets1	Timp1	Unknown
Ets1	Tlr4	Activation
Ets1	Vegfa	Unknown
Ets1	Vwf	Activation
Ets1	Zeb1	Activation
Ets1	Zeb1	Unknown
Ets2	Bcl2l1	Activation
Ets2	Bcl2l1	Unknown
Ets2	Cd4	Activation
Ets2	Cdkn2a	Activation
Ets2	Csf1r	Activation
Ets2	Csf3r	Activation
Ets2	Dusp6	Unknown
Ets2	Egr1	Unknown
Ets2	Erg	Activation
Ets2	Etv4	Unknown
Ets2	Fli1	Activation
Ets2	Flt4	Unknown
Ets2	Hmox1	Activation
Ets2	Hmox2	Activation
Ets2	Ifne	Activation
Ets2	Jun	Unknown
Ets2	Kit	Unknown
Ets2	Krt8	Activation
Ets2	Mdm2	Activation
Ets2	Mir126a	Activation
Ets2	Nab2	Activation
Ets2	Nos2	Activation
Ets2	Pcyt1a	Activation
Ets2	Setdb1	Unknown
Ets2	Sh2d1a	Unknown
Ets2	Stab1	Activation
Ets2	Tlr13	Activation
Etv1	Ebf1	Repression
Etv1	Fgf10	Activation
Etv1	Nab2	Activation
Etv1	Pomc	Activation
Etv1	Th	Unknown
Etv2	Fli1	Unknown
Etv2	Lmo2	Activation
Etv2	Plau	Unknown
Etv2	Sox9	Activation
Etv2	Spi1	Unknown
Etv2	Tek	Unknown
Etv4	Ccnd2	Activation
Etv4	Ccnd2	Repression
Etv4	Dusp6	Unknown
Etv4	Erbb2	Repression
Etv4	Gpx5	Activation
Etv4	Mmp3	Activation
Etv4	Mmp7	Activation
Etv4	Mmp9	Unknown
Etv4	Mta2	Unknown
Etv4	Plau	Activation
Etv4	Ptgs2	Activation
Etv4	Tert	Activation
Etv4	Tgfbr2	Unknown
Etv4	Twist1	Activation
Etv4	Vim	Activation
Etv4	Zhx1	Activation
Etv5	Cav1	Activation
Etv5	Elmo1	Unknown
Etv5	Il17a	Activation
Etv5	Il17f	Activation
Etv5	Parg	Unknown
Etv5	Ptgs2	Activation
Etv6	Fli1	Repression
Etv6	Mmp3	Repression
Ewsr1	Fgf10	Activation
Ewsr1	Tert	Activation
Ewsr1	Upp1	Activation
Eya1	Atoh1	Activation
Eya2	Mtor	Activation
Ezh1	Tollip	Repression
Ezh2	Bad	Repression
Ezh2	Bcl2l11	Unknown
Ezh2	Ccna2	Unknown
Ezh2	Creb3l1	Unknown
Ezh2	Dkk1	Unknown
Ezh2	Hey2	Unknown
Ezh2	Il17a	Activation
Ezh2	Il17f	Activation
Ezh2	Il9	Repression
Ezh2	Il17f	Activation
Ezh2	Nanog	Repression
Ezh2	Neurog1	Unknown
Ezh2	Tbx21	Activation
Ezh2	Trp53	Unknown
Ezh2	Unc5b	Unknown
Fhl2	Fos	Activation
Fli1	Ccl2	Activation
Fli1	Cyr61	Activation
Fli1	Erg	Activation
Fli1	Ezh2	Activation
Fli1	Fli1	Activation
Fli1	Inpp5d	Repression
Fli1	Itga2b	Activation
Fli1	Itga2b	Unknown
Fli1	Lyl1	Activation
Fli1	Mmp13	Unknown
Fli1	Rb1	Repression
Fli1	Smad6	Activation
Fli1	Tert	Activation
Fli1	Upp1	Activation
Fmr1	Rac1	Repression
Fos	Acp5	Unknown
Fos	Bdnf	Unknown
Fos	Bmp2	Unknown
Fos	Ccl5	Unknown
Fos	Crh	Repression
Fos	Csf3	Unknown
Fos	Cxcl15	Unknown
Fos	Dcstamp	Unknown
Fos	Egr1	Unknown
Fos	Fam89b	Unknown
Fos	Fos	Repression
Fos	Fos	Unknown
Fos	Gnrh1	Repression
Fos	Gria1	Unknown
Fos	Grik2	Unknown
Fos	H2-K1	Unknown
Fos	Hmgcr	Unknown
Fos	Ifne	Activation
Fos	Igk	Unknown
Fos	Il1rl1	Unknown
Fos	Il2	Activation
Fos	Il2	Unknown
Fos	Il27	Activation
Fos	Il6	Unknown
Fos	Jun	Unknown
Fos	Krt18	Activation
Fos	Mapk8	Unknown
Fos	Mmp2	Unknown
Fos	Mmp9	Repression
Fos	Mt1	Unknown
Fos	Nacc1	Activation
Fos	Nck2	Unknown
Fos	Nefl	Activation
Fos	Nfatc1	Unknown
Fos	Nfe2l2	Repression
Fos	Ngf	Activation
Fos	Ngf	Unknown
Fos	Nos2	Activation
Fos	Nr3c1	Activation
Fos	Pdpn	Unknown
Fos	Penk	Activation
Fos	Plau	Unknown
Fos	Pomc	Unknown
Fos	Ppp1r3b	Activation
Fos	Spi1	Repression
Fos	Slc10a2	Unknown
Fos	Socs3	Unknown
Fos	Src	Activation
Fos	Srr	Activation
Fos	Srxn1	Activation
Fos	Star	Unknown
Fos	Stim1	Unknown
Fos	Tff2	Repression
Fos	Tgfb1	Activation
Fos	Tinagl1	Unknown
Fos	Tpsab1	Activation
Fos	Trp53	Unknown
Fos	Tslp	Unknown
Fos	Wee1	Unknown
Fosb	Cdh1	Repression
Fosb	Fos	Repression
Fosb	Mmp2	Unknown
Fosl1	Fos	Repression
Fosl1	Jun	Activation
Fosl1	Mmp2	Unknown
Fosl1	Nfe2l2	Repression
Fosl1	Prdm1	Repression
Fosl1	Thbs1	Repression
Fosl1	Thbs2	Repression
Fosl2	Adipoq	Repression
Fosl2	Relb	Activation
Fosl2	Relb	Unknown
Fosl2	Tcirg1	Unknown
Fosl2	Tgfb1	Activation
Fosl2	Tgfb3	Activation
Foxa1	Afp	Activation
Foxa1	Cbx5	Unknown
Foxa1	Gcg	Activation
Foxa1	Gcg	Unknown
Foxa1	Muc2	Activation
Foxa1	Pdx1	Unknown
Foxa1	Scgb1a1	Unknown
Foxa1	Sftpa1	Unknown
Foxa1	Sftpb	Unknown
Foxa1	Sftpc	Unknown
Foxa1	Sftpd	Unknown
Foxa2	Ascl1	Repression
Foxa2	Birc2	Unknown
Foxa2	Cbx5	Unknown
Foxa2	Ccl11	Repression
Foxa2	Ccl20	Repression
Foxa2	Cdc73	Unknown
Foxa2	Cpt1a	Unknown
Foxa2	Cul2	Unknown
Foxa2	Ferd3l	Activation
Foxa2	Ferd3l	Unknown
Foxa2	G6pc	Repression
Foxa2	G6pc2	Unknown
Foxa2	Gcg	Unknown
Foxa2	Gli2	Unknown
Foxa2	Hadh	Activation
Foxa2	Hcrt	Activation
Foxa2	Helt	Repression
Foxa2	Hhex	Unknown
Foxa2	Hmgcs2	Unknown
Foxa2	Il13	Repression
Foxa2	Il33	Repression
Foxa2	Il4	Repression
Foxa2	Lcn5	Repression
Foxa2	Lcn5	Unknown
Foxa2	Lmx1a	Activation
Foxa2	Lmx1b	Activation
Foxa2	Map1b	Unknown
Foxa2	Mchr1	Activation
Foxa2	Msx1	Activation
Foxa2	Muc2	Activation
Foxa2	Otx1	Repression
Foxa2	Otx2	Unknown
Foxa2	Pdx1	Activation
Foxa2	Pdx1	Unknown
Foxa2	Pgf	Unknown
Foxa2	Reg3g	Unknown
Foxa2	Sox17	Activation
Foxa2	Sox2	Repression
Foxa2	St18	Unknown
Foxa2	Tbx1	Activation
Foxa2	Tle4	Repression
Foxa2	Vtn	Activation
Foxa2	Wnt7b	Activation
Foxa3	Cdx2	Activation
Foxc1	Cxcl12	Activation
Foxc1	Cxcr4	Activation
Foxc1	Dll4	Activation
Foxc1	Dll4	Unknown
Foxc1	Hey2	Activation
Foxc1	Msx2	Activation
Foxc1	Runx2	Activation
Foxc1	Snai1	Activation
Foxc1	Tbx1	Activation
Foxc2	Cxcr4	Activation
Foxc2	Dll4	Activation
Foxc2	Dll4	Unknown
Foxc2	Gja4	Unknown
Foxc2	Hand1	Activation
Foxc2	Hey2	Activation
Foxc2	Itgb3	Unknown
Foxc2	Tbx1	Activation
Foxd1	Lhb	Activation
Foxd1	Pgf	Activation
Foxd3	Grb2	Activation
Foxg1	Cdkn1a	Repression
Foxg1	Cdkn2b	Repression
Foxg1	Dmrt3	Repression
Foxg1	Dmrta1	Repression
Foxg1	Ebf2	Repression
Foxg1	Ebf3	Repression
Foxg1	Eya2	Repression
Foxg1	Serpine1	Repression
Foxh1	Gsc	Activation
Foxh1	Mef2c	Activation
Foxh1	Mixl1	Activation
Foxh1	Mixl1	Repression
Foxh1	Nodal	Unknown
Foxh1	Smad2	Unknown
Foxi1	Slc4a9	Unknown
Foxj1	Amelx	Unknown
Foxj1	Foxa1	Activation
Foxj3	Mef2c	Activation
Foxl1	Ccnd1	Activation
Foxl1	Wnt3a	Activation
Foxl1	Wnt7b	Activation
Foxl2	Fshb	Activation
Foxl2	Mc2r	Activation
Foxl2	Sf1	Repression
Foxm1	Axin2	Activation
Foxm1	Brip1	Unknown
Foxm1	Cdh1	Unknown
Foxm1	Cdkn2a	Unknown
Foxm1	Ikbkb	Unknown
Foxm1	Lama4	Activation
Foxm1	Lif	Unknown
Foxm1	Myc	Activation
Foxm1	Mycn	Unknown
Foxm1	Nfkb2	Unknown
Foxm1	Nr4a2	Unknown
Foxm1	Pou5f1	Activation
Foxm1	Prrc2a	Unknown
Foxm1	Ptgs2	Unknown
Foxm1	Pttg1	Unknown
Foxm1	Scgb1a1	Unknown
Foxm1	Sftpb	Unknown
Foxm1	Sftpc	Unknown
Foxm1	Snai1	Activation
Foxm1	Snai2	Activation
Foxm1	Socs3	Activation
Foxm1	Sox2	Unknown
Foxm1	Stat3	Unknown
Foxn1	Dsg4	Repression
Foxn1	Notch1	Activation
Foxn4	Dll4	Activation
Foxo1	Adipoq	Activation
Foxo1	Adipor1	Activation
Foxo1	Akt1	Activation
Foxo1	Alpl	Activation
Foxo1	Angpt2	Unknown
Foxo1	Apoc3	Unknown
Foxo1	Bax	Repression
Foxo1	Bcl2l11	Unknown
Foxo1	Bglap2	Unknown
Foxo1	Casp8	Activation
Foxo1	Ccl2	Activation
Foxo1	Ccl20	Unknown
Foxo1	Ccnd1	Repression
Foxo1	Ccnd2	Repression
Foxo1	Ccng2	Activation
Foxo1	Ccr2	Unknown
Foxo1	Ccr7	Unknown
Foxo1	Cdkn1a	Activation
Foxo1	Cdkn1a	Unknown
Foxo1	Cdkn1b	Activation
Foxo1	Edn1	Unknown
Foxo1	Egr1	Repression
Foxo1	Fasl	Unknown
Foxo1	Foxa2	Unknown
Foxo1	Foxp3	Unknown
Foxo1	Fshb	Repression
Foxo1	G6pc	Activation
Foxo1	G6pc	Repression
Foxo1	G6pc	Unknown
Foxo1	Gck	Repression
Foxo1	Igfbp1	Activation
Foxo1	Ikzf1	Activation
Foxo1	Il7r	Activation
Foxo1	Ins2	Repression
Foxo1	Klf2	Unknown
Foxo1	Lhb	Unknown
Foxo1	Lpl	Activation
Foxo1	Mmp13	Unknown
Foxo1	Myh7	Activation
Foxo1	Nos3	Repression
Foxo1	Ostn	Repression
Foxo1	Pck1	Repression
Foxo1	Pck1	Unknown
Foxo1	Pdk4	Activation
Foxo1	Pdx1	Repression
Foxo1	Pdx1	Unknown
Foxo1	Pik3r1	Activation
Foxo1	Pparg	Repression
Foxo1	Ppargc1a	Unknown
Foxo1	Runx2	Unknown
Foxo1	Sell	Activation
Foxo1	Sell	Unknown
Foxo1	Srebf1	Repression
Foxo1	Trib3	Repression
Foxo1	Trim63	Unknown
Foxo1	G6pc	Unknown
Foxo3	Ccnd1	Repression
Foxo3	Ccnd2	Repression
Foxo3	Ccng2	Activation
Foxo3	Cdkn1b	Activation
Foxo3	Gadd45a	Activation
Foxo3	Lcn2	Activation
Foxo3	Nol3	Activation
Foxo3	Sirt1	Activation
Foxo3	Socs3	Activation
Foxo4	Anxa8	Repression
Foxo4	Bcl2l11	Unknown
Foxo4	Ccnd1	Repression
Foxo4	Ccnd2	Repression
Foxo4	Gadd45a	Activation
Foxo4	Ppargc1a	Unknown
Foxo4	Rbl2	Activation
Foxp1	Fgf16	Activation
Foxp1	Fgf17	Activation
Foxp1	Fgf20	Activation
Foxp1	Fgf3	Activation
Foxp1	Lhx3	Unknown
Foxp1	Scgb1a1	Repression
Foxp2	Scgb1a1	Repression
Foxp2	Sftpc	Activation
Foxp2	Sftpc	Repression
Foxp2	Nkx2-1	Repression
Foxp3	Brca1	Repression
Foxp3	Ctla4	Activation
Foxp3	Ctla4	Unknown
Foxp3	Erbb2	Repression
Foxp3	Ifng	Repression
Foxp3	Il17a	Repression
Foxp3	Il2	Repression
Foxp3	Il2	Unknown
Foxp3	Il22	Activation
Foxp3	Il2ra	Activation
Foxp3	Nfkb1	Unknown
Foxp3	Opn1sw	Activation
Foxp3	Skp2	Repression
Foxp3	Tnfrsf18	Activation
Foxq1	Cdh1	Repression
Foxq1	Mylk	Repression
Fus	Mdm2	Repression
Fus	Sod2	Unknown
Gabpa	Chrne	Activation
Gabpa	Cox4i1	Unknown
Gabpa	Cyp7b1	Unknown
Gabpa	Il10	Activation
Gabpa	Il7r	Activation
Gabpa	Skp2	Activation
Gabpa	Sod3	Activation
Gabpb1	Sod3	Activation
Gata1	Ccna1	Activation
Gata1	Cdc6	Activation
Gata1	Cga	Unknown
Gata1	Pf4	Activation
Gata1	Epb42	Unknown
Gata1	Epb42	Activation
Gata1	Fcer1g	Activation
Gata1	Fli1	Repression
Gata1	Fli1	Unknown
Gata1	Hbb-ar	Unknown
Gata1	Itga2b	Unknown
Gata1	Nfe2	Unknown
Gata1	Spi1	Repression
Gata1	Sigmar1	Activation
Gata1	Spi1	Repression
Gata1	Tal1	Unknown
Gata1	Tfdp2	Activation
Gata1	Usp17la	Unknown
Gata1	Zbtb7a	Unknown
Gata1	Zfp26	Repression
Gata2	Angpt2	Activation
Gata2	Cebpa	Repression
Gata2	Csf2	Activation
Gata2	Lyl1	Activation
Gata2	Nkx6-1	Unknown
Gata2	Rc3h1	Activation
Gata2	Spi1	Activation
Gata2	Spi1	Repression
Gata2	Smad6	Activation
Gata2	Spi1	Activation
Gata2	Spi1	Repression
Gata2	Spi1	Unknown
Gata2	Tac2	Activation
Gata2	Tshb	Unknown
Gata3	Cdkn2c	Repression
Gata3	Cdx2	Activation
Gata3	Dlc1	Activation
Gata3	Erg	Activation
Gata3	Fgf10	Activation
Gata3	Foxp3	Unknown
Gata3	Ifng	Repression
Gata3	Il10	Activation
Gata3	Il13	Activation
Gata3	Il24	Activation
Gata3	Il3	Activation
Gata3	Il4	Unknown
Gata3	Il5	Activation
Gata3	Il5	Unknown
Gata3	Mycn	Unknown
Gata3	Rag2	Activation
Gata3	Runx3	Repression
Gata3	Tbx21	Repression
Gata3	Tbx21	Unknown
Gata4	Adora1	Activation
Gata4	Amh	Activation
Gata4	Amh	Unknown
Gata4	Ankrd1	Unknown
Gata4	Bmp4	Unknown
Gata4	Ccnd2	Activation
Gata4	Ccnd2	Unknown
Gata4	Dmrt1	Activation
Gata4	Epor	Activation
Gata4	Hesx1	Unknown
Gata4	Hexim1	Unknown
Gata4	Hhex	Unknown
Gata4	Hspa5	Activation
Gata4	Id2	Activation
Gata4	Ifi204	Activation
Gata4	Lhx9	Repression
Gata4	Lrrc10	Activation
Gata4	Mef2c	Unknown
Gata4	Myog	Repression
Gata4	Nkx2-5	Unknown
Gata4	Nppa	Activation
Gata4	Nppb	Activation
Gata4	Spdef	Activation
Gata4	Star	Unknown
Gata6	Bhlha15	Unknown
Gata6	Cav1	Repression
Gata6	Cdx2	Activation
Gata6	Mylk	Repression
Gata6	Nkx2-1	Activation
Gata6	Nox1	Repression
Gata6	Ppp1r14a	Unknown
Gata6	Rbpjl	Unknown
Gata6	Sftpa1	Activation
Gata6	Sftpc	Activation
Gata6	Shh	Repression
Gata6	Spdef	Activation
Gata6	Tnnc1	Activation
Gata6	Ttf1	Activation
Gata6	Wnt7b	Activation
Gbx2	Lhx9	Repression
Gbx2	Lmo3	Repression
Gbx2	Otx2	Repression
Gbx2	Otx2	Unknown
Gbx2	Robo1	Activation
Gbx2	Shh	Activation
Gcfc2	Egfr	Repression
Gcgr	Crh	Repression
Gcgr	G6pc	Repression
Gcm2	Pth	Activation
Gfi1	Bak1	Repression
Gfi1	Bax	Repression
Gfi1	Cdkn1a	Repression
Gfi1	Cdkn2b	Repression
Gfi1	Elane	Unknown
Gfi1	Gfi1b	Unknown
Gfi1	Id2	Repression
Gfi1	Il7r	Repression
Gfi1	Spi1	Repression
Gfi1	Zbtb16	Unknown
Gfi1b	Elf4	Repression
Gfi1b	Gfi1	Unknown
Gfi1b	Gfi1b	Unknown
Gfi1b	Meis1	Activation
Gfi1b	Rag1	Activation
Gfi1b	Rag2	Activation
Gfi1b	Rcor2	Repression
Gfi1b	Socs1	Repression
Gfi1b	Socs3	Repression
Gli1	Cdh1	Repression
Gli1	Foxm1	Activation
Gli1	Has2	Activation
Gli1	Nhlh1	Activation
Gli1	Pdgfra	Unknown
Gli1	Pvr	Activation
Gli1	Runx2	Activation
Gli1	Runx3	Activation
Gli2	Ascl1	Activation
Gli2	Ascl1	Unknown
Gli2	Bmp2	Activation
Gli2	Fgf15	Unknown
Gli2	Fkbp8	Unknown
Gli2	Foxe1	Repression
Gli2	Gli1	Activation
Gli2	Gli1	Unknown
Gli2	Hes1	Activation
Gli2	Ifitm5	Activation
Gli2	Myf5	Activation
Gli2	Myf5	Unknown
Gli2	Ndp	Unknown
Gli2	Pax3	Activation
Gli2	Ptch1	Activation
Gli2	Shh	Unknown
Gli2	Sox8	Unknown
Gli3	Fgf8	Unknown
Gli3	Gli1	Activation
Gli3	Gli1	Unknown
Gli3	Gli2	Unknown
Gli3	Has2	Unknown
Gli3	Myf5	Repression
Gli3	Nkx6-1	Unknown
Gli3	Pitrm1	Repression
Gli3	Pvr	Activation
Gli3	Shh	Repression
Glis2	Ins2	Activation
Glis3	Neurog3	Activation
Gnrh1	Lhb	Activation
Grin1	Cox4i1	Activation
Gsc	Foxh1	Unknown
Gsc	Gsc2	Unknown
Gsc	Mixl1	Repression
Gsc	Mixl1	Unknown
Gsx2	Ppp1r1b	Activation
Gtf2a1	Prm1	Unknown
Gtf2a1	Tnp1	Unknown
Gtf2a2	Bglap	Activation
Gtf2b	Hspb1	Unknown
Gtf2h1	Keap1	Activation
Gtf2i	Akap12	Unknown
Gtf2i	Ccl7	Activation
Gtf2i	Ccnd1	Activation
Gtf2i	Cfdp1	Unknown
Gtf2i	Csrp2	Repression
Gtf2i	Dlk1	Repression
Gtf2i	Folr1	Repression
Gtf2i	Fos	Activation
Gtf2i	Fos	Unknown
Gtf2i	Gsc	Activation
Gtf2i	Hspa5	Unknown
Gtf2i	Id1	Unknown
Gtf2i	Igh	Activation
Gtf2i	Nsd1	Unknown
Gtf2i	Sec23a	Unknown
Gtf2i	Tgfb2	Activation
Gtf2i	Tgfbr2	Repression
Gtf2ird1	Ccl7	Activation
Gtf2ird1	Csrp2	Repression
Gtf2ird1	Dlk1	Repression
Gtf2ird1	Folr1	Repression
Gtf2ird1	Tgfb2	Activation
Gtf2ird1	Tgfbr2	Repression
Gzf1	Hoxa10	Repression
Hand2	Dbh	Unknown
Hand2	Dlx5	Repression
Hand2	Dlx6	Repression
Hand2	Msx1	Unknown
Hand2	Phox2b	Activation
Hand2	Runx2	Repression
Havcr2	Nelfcd	Repression
Hbp1	Myod1	Repression
Hbp1	Myog	Repression
Hcfc1	Rb1	Unknown
Hcls1	Ighg2b	Activation
Hcls1	Ighg2b	Unknown
Hdac1	Akap12	Repression
Hdac1	Ar	Repression
Hdac1	Bglap	Unknown
Hdac1	Ccl5	Unknown
Hdac1	Cd1d2	Repression
Hdac1	Cdc25a	Repression
Hdac1	Cdkn1a	Unknown
Hdac1	Cdkn1b	Unknown
Hdac1	Cebpb	Unknown
Hdac1	Comp	Unknown
Hdac1	Csn2	Unknown
Hdac1	Fas	Repression
Hdac1	Fshr	Repression
Hdac1	Il6	Unknown
Hdac1	Il12b	Unknown
Hdac1	Jun	Unknown
Hdac1	Nfkbia	Repression
Hdac1	Nfya	Unknown
Hdac1	Nos2	Unknown
Hdac1	Pparg	Unknown
Hdac1	Ppp2ca	Activation
Hdac1	Rbl2	Unknown
Hdac1	Reck	Unknown
Hdac1	Rhox5	Unknown
Hdac1	Sp1	Unknown
Hdac1	Spp1	Activation
Hdac1	Star	Unknown
Hdac1	Epcam	Unknown
Hdac11	Il10	Repression
Hdac2	Bmp7	Repression
Hdac2	Ccl12	Unknown
Hdac2	Ccne1	Repression
Hdac2	Cd1d2	Repression
Hdac2	Cdkn1a	Unknown
Hdac2	Grm2	Unknown
Hdac2	Nfkbia	Repression
Hdac2	Nos2	Unknown
Hdac2	Smarca4	Unknown
Hdac2	Star	Unknown
Hdac3	Bcl2l1	Unknown
Hdac3	Cdkn1b	Unknown
Hdac3	Fos	Unknown
Hdac3	Jun	Repression
Hdac3	Nfkbia	Repression
Hdac3	Nr4a2	Unknown
Hdac3	Phlpp1	Unknown
Hdac4	Runx2	Repression
Hdgf	Vegfa	Activation
Hdgf	Vegfb	Activation
Hes1	Ascl1	Activation
Hes1	Ascl1	Unknown
Hes1	Cdkn1b	Repression
Hes1	Cdkn1c	Repression
Hes1	Coro1a	Repression
Hes1	Htr1a	Unknown
Hes1	Map2	Repression
Hes6	Hes1	Repression
Hes6	Htr1a	Unknown
Hes7	Lfng	Repression
Hes7	Mesp2	Activation
Hesx1	Cga	Repression
Hesx1	Dnmt1	Unknown
Hesx1	Fshb	Repression
Hesx1	Lhb	Repression
Hesx1	Pou1f1	Repression
Hesx1	Prop1	Repression
Hexim1	Ccnd1	Repression
Hexim1	Ccnd1	Unknown
Hexim1	Vegfa	Unknown
Hey1	Gata4	Repression
Hey1	Gata6	Repression
Hey1	Id1	Repression
Hey1	Nppa	Repression
Hey1	Olig2	Repression
Hey1	Runx2	Activation
Hey2	Gata4	Repression
Hey2	Gata4	Unknown
Hey2	Gata6	Repression
Hey2	Mmp10	Repression
Hey2	Nppa	Repression
Heyl	Nppa	Repression
Hgf	Met	Activation
Hhex	Esm1	Repression
Hic1	Atoh1	Activation
Hic1	Efna1	Repression
Hif1a	Fam162a	Unknown
Hif1a	Bace1	Activation
Hif1a	Bsg	Activation
Hif1a	Cited2	Activation
Hif1a	Crebbp	Activation
Hif1a	Ctgf	Activation
Hif1a	Dll4	Activation
Hif1a	Epo	Activation
Hif1a	Epo	Repression
Hif1a	Epo	Unknown
Hif1a	G6pc	Unknown
Hif1a	Hey1	Activation
Hif1a	Hey2	Activation
Hif1a	Hmox1	Unknown
Hif1a	Mdk	Activation
Hif1a	Mt1	Activation
Hif1a	Myocd	Unknown
Hif1a	Pfkfb3	Activation
Hif1a	Ptgs2	Unknown
Hif1a	Serpine1	Activation
Hif1a	Snai1	Activation
Hif1a	Tuft1	Unknown
Hif1a	Vegfa	Activation
Hif1a	Vegfa	Unknown
Hivep2	Bglap2	Activation
Hivep2	Pparg	Activation
Hlf	Abcb1a	Unknown
Hlf	Epo	Unknown
Hltf	Scgb3a1	Unknown
Hlx	Il12a	Activation
Hlx	Il12b	Activation
Hmga1	Brca1	Repression
Hmga1	Insr	Unknown
Hmga1	Rag2	Unknown
Hmga1	Rbp4	Unknown
Hmga2	Cdh1	Repression
Hmga2	Igf2bp2	Unknown
Hmga2	Mia	Repression
Hmga2	Nfkb1	Activation
Hmga2	Nkx2-5	Unknown
Hmga2	Snai1	Unknown
Hmga2	Snai2	Activation
Hmga2	Twist1	Activation
Hmgb2	Runx2	Repression
Hmgn3	Slc2a2	Unknown
Hnf1a	Bcl6	Activation
Hnf1a	Cldn2	Unknown
Hnf1a	Crp	Unknown
Hnf1a	Cyp1a2	Activation
Hnf1a	Cyp27a1	Activation
Hnf1a	Cyp2a5	Repression
Hnf1a	Cyp2b10	Repression
Hnf1a	Cyp2c29	Activation
Hnf1a	Cyp2d9	Repression
Hnf1a	Cyp2e1	Activation
Hnf1a	Cyp39a1	Repression
Hnf1a	Cyp3a11	Activation
Hnf1a	Cyp7a1	Repression
Hnf1a	Cyp7b1	Activation
Hnf1a	Cyp8b1	Repression
Hnf1a	Glb1	Unknown
Hnf1a	Guca2a	Activation
Hnf1a	Il17a	Repression
Hnf1a	Kitl	Activation
Hnf1a	Lct	Activation
Hnf1a	Mgam	Unknown
Hnf1a	Pax4	Activation
Hnf1a	Pck1	Activation
Hnf1a	Pkhd1	Activation
Hnf1a	Prdm1	Repression
Hnf1a	Rorc	Activation
Hnf1a	Slc6a19	Activation
Hnf1a	Slco1b2	Activation
Hnf1a	Slco1b2	Unknown
Hnf1a	Soat2	Unknown
Hnf1b	Egr2	Unknown
Hnf1b	Kif12	Repression
Hnf1b	Mafb	Activation
Hnf1b	Onecut1	Unknown
Hnf1b	Pde4c	Unknown
Hnf1b	Pkhd1	Activation
Hnf1b	Socs3	Repression
Hnf4a	Acmsd	Unknown
Hnf4a	Apoa4	Activation
Hnf4a	Apoa4	Unknown
Hnf4a	Apoc3	Unknown
Hnf4a	Cdx2	Activation
Hnf4a	Cebpa	Activation
Hnf4a	Cebpb	Activation
Hnf4a	Cfb	Unknown
Hnf4a	Csn2	Repression
Hnf4a	Cyp2a4	Repression
Hnf4a	Cyp2b9	Repression
Hnf4a	Cyp3a11	Unknown
Hnf4a	Cyp3a41a	Unknown
Hnf4a	Cyp4a12a	Activation
Hnf4a	Cyp4a12b	Activation
Hnf4a	Cyp7a1	Activation
Hnf4a	Cyp7a1	Repression
Hnf4a	Cyp7a1	Unknown
Hnf4a	F12	Unknown
Hnf4a	Foxa1	Repression
Hnf4a	Foxa2	Repression
Hnf4a	G6pc	Activation
Hnf4a	G6pc	Unknown
Hnf4a	Gck	Activation
Hnf4a	Gstp1	Activation
Hnf4a	Gstp2	Activation
Hnf4a	Hmga2	Activation
Hnf4a	Lipc	Unknown
Hnf4a	Onecut1	Repression
Hnf4a	Pck1	Unknown
Hnf4a	Perp	Unknown
Hnf4a	Pklr	Activation
Hnf4a	Ppara	Activation
Hnf4a	Ppara	Unknown
Hnf4a	Ppargc1a	Repression
Hnf4a	Rare1	Unknown
Hnf4a	Rare2	Unknown
Hnf4a	Shbg	Activation
Hnf4a	Slc10a1	Repression
Hnf4a	Slc27a5	Repression
Hnf4a	Slc6a19	Activation
Hnrnpd	Cry1	Activation
Hnrnpd	Thy1	Unknown
Hnrnpk	Slc1a2	Unknown
Hoxa1	Epha2	Activation
Hoxa10	Dkk1	Activation
Hoxa10	Gata1	Unknown
Hoxa10	Gfi1	Activation
Hoxa10	Hlf	Unknown
Hoxa10	Mylk	Unknown
Hoxa10	Phgdh	Repression
Hoxa10	Tdo2	Activation
Hoxa10	Tdo2	Repression
Hoxa11	Myod1	Repression
Hoxa2	Meox1	Unknown
Hoxa2	Pcp4	Unknown
Hoxa2	Runx2	Repression
Hoxa2	Six2	Unknown
Hoxa3	Hoxd3	Unknown
Hoxa4	Th	Unknown
Hoxa5	Igfbp1	Activation
[truncated: 5,058 more rows]
